# Supplementary material for: Nucleophile and base differentiation of pyridine with tetrahalocatechols and the formation of manganese(iii)-catecholate and pyridinium-catecholate complexes for thein situgeneration of H2O2from O2
Source: Royal Society of Chemistry journal article supplement (doi:10.1039/c7nj02725g), 2017-01-01
Supplement: c7nj02725g1.pdf [file c7nj02725g1.pdf]

## **Supplementary Information**

### **Nucleophile and Base Differentiation of Pyridine in Reaction with Tetrahalocatechols and the Formation of Manganese(III)-Catecholate and Pyridinium-Catecholate Complexes for the *in situ* Generation of Hydrogen Peroxide from Dioxygen**

Nicholas Bakewell, Rumintha Thavarajah, Majid Motevalli and Tippu S. Sheriff

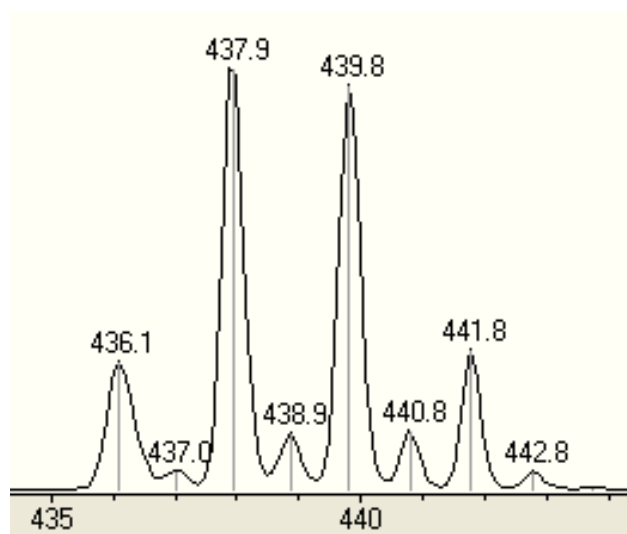

**ESI1.** Expanded positive mode mass spectrum showing the mass peak range of the cation ( $-\text{Br}^-$ ) of **(4)**. Major peaks expected at 436.0, 438.0, 440.0, and 442.0.

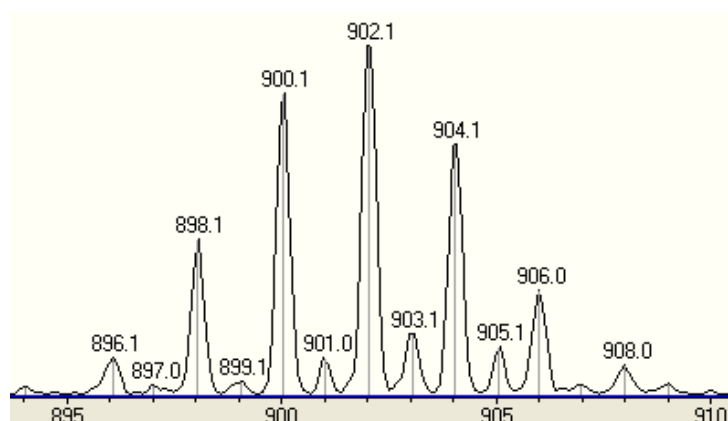

**ESI2.** Expanded negative mode peak range in the mass spectrum of the anion of complex **(6)** with removal of the labile axial pyridine and H<sub>2</sub>O ligands. Calculated peak range between  $m/z$ =894.4 and 910.4.
